# Supplementary material
Source: PubMed Central journal article supplement (PMC4795011)

# Supplemental Figure 1

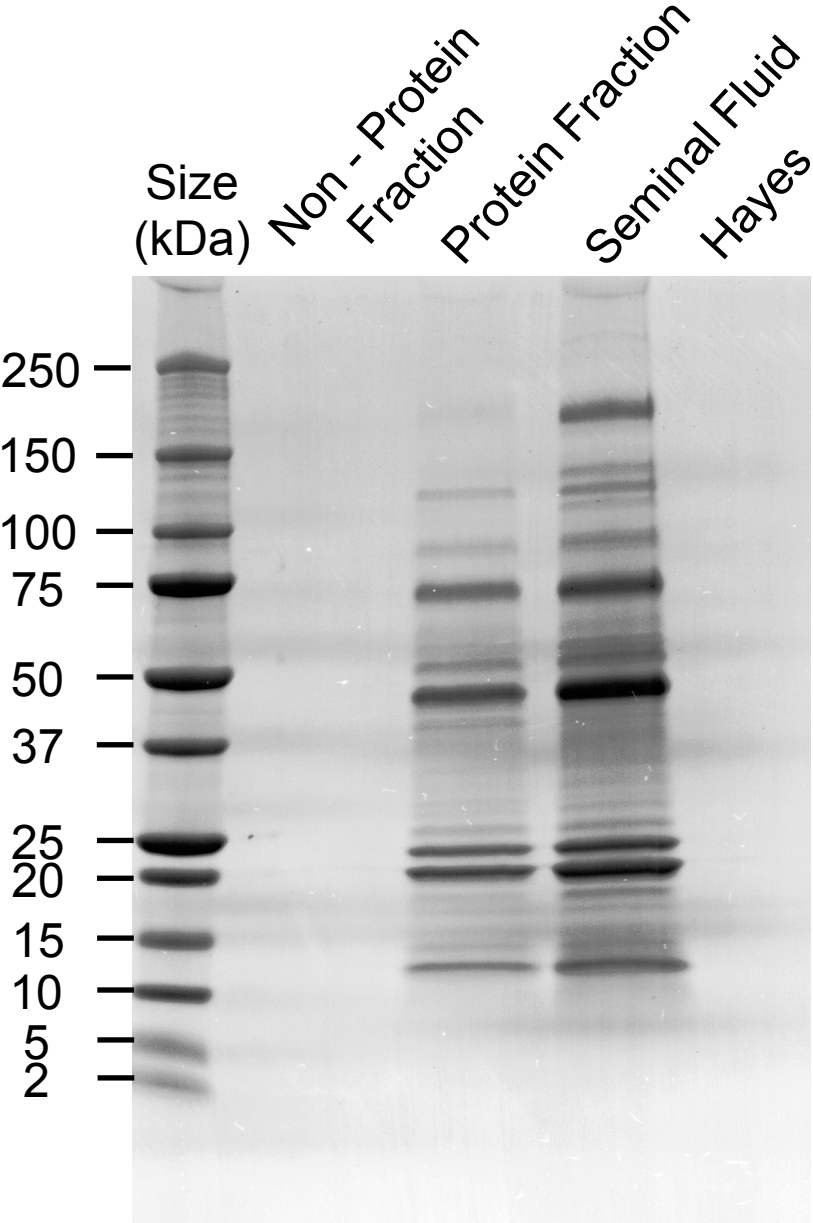

Supplement: rspb20151785supp1.pdf [file rspb20151785supp1.pdf]
